# Supplementary material for: A multiple laser-induced hybrid electrode for flexible triboelectric nanogenerators
Source: Royal Society of Chemistry journal article supplement (doi:10.1039/d1se00819f), 2021-01-01
Supplement: d1se00819f1.pdf [file d1se00819f1.pdf]

**Multiple laser-induced hybrid electrode for flexible triboelectric nanogenerator**

*Huamin Chen, Wei Yang, Peiyu Huang, Chenyu Li, Yaqian Yang, Biao Zheng, Cheng Zhang, Ruping Liu, Yuliang Li, Yun Xu, Jun Wang\*, Zhou Li \**

E-mail: [wangjun2@mju.edu.cn](mailto:wangjun2@mju.edu.cn)

E-mail: [zli@binn.cas.cn](mailto:zli@binn.cas.cn)

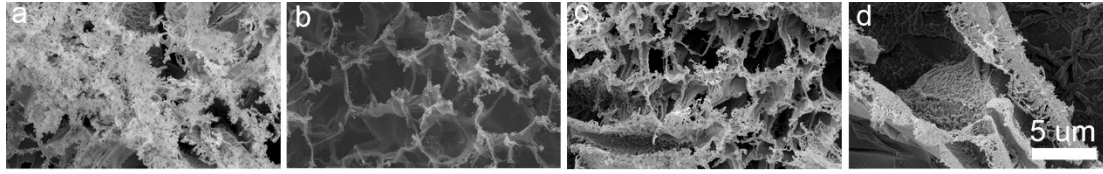

**Figure S1.** The SEM images of Au-LIG electrode under various laser power of (a) 3.85 W, (b) 4.4 W, (c) 4.95 W, (d) 5.5 W at a scan depth of 10  $\mu\text{m}$ .

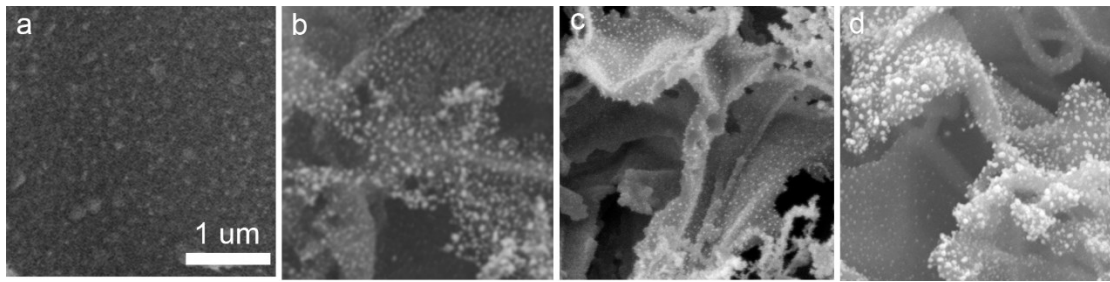

**Figure S2.** The SEM images of the Au-LIG electrode with various  $\text{HAuCl}_4$  concentration of (a) 0.1 mg/mL, (b) 0.2 mg/mL, (c) 0.3 mg/mL and (d) 0.5 mg/mL.

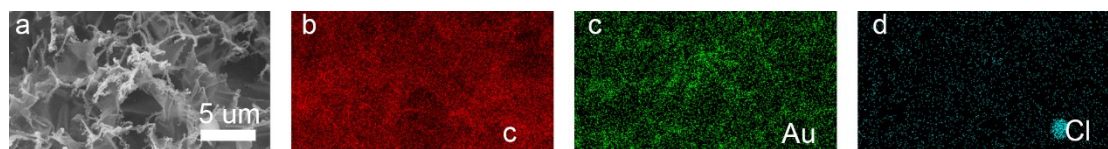

**Figure S3.** The EDS mapping of the Au-LIG electrode.
